# Supplementary material for: Competition Between Antiferromagnetism and Ferromagnetism in Sr2RuO4 Probed by Mn and Co Doping
Source: PubMed Central journal article supplement — Sci Rep. 2013 Oct 15;3:2950. doi: 10.1038/srep02950 (PMC3796744; doi:10.1038/srep02950), 2013-10-15
Supplement: srep02950-s1.pdf [file srep02950-s1.pdf]

**Competition Between Antiferromagnetism and Ferromagnetism in  $\text{Sr}_2\text{RuO}_4$  Probed  
by Mn and Co Doping**

J. E. Ortmann<sup>1</sup>, Jinyu Liu<sup>1</sup>, Jin Hu<sup>1</sup>, M. Zhu<sup>2</sup>, Jin Peng<sup>1</sup>, M. Matsuda<sup>3</sup>, X. Ke<sup>2</sup>, Z. Q.  
Mao<sup>1\*</sup>

<sup>1</sup>Department of Physics and Engineering Physics, Tulane University, New Orleans,  
Louisiana 70118, USA

<sup>2</sup>Department of Physics and Astronomy, Michigan State University, East Lansing,  
Michigan 48825, USA

<sup>3</sup> Quantum Condensed Matter Division, Oak Ridge National Laboratory, Oak Ridge,  
Tennessee 37831, USA

Supplementary Information

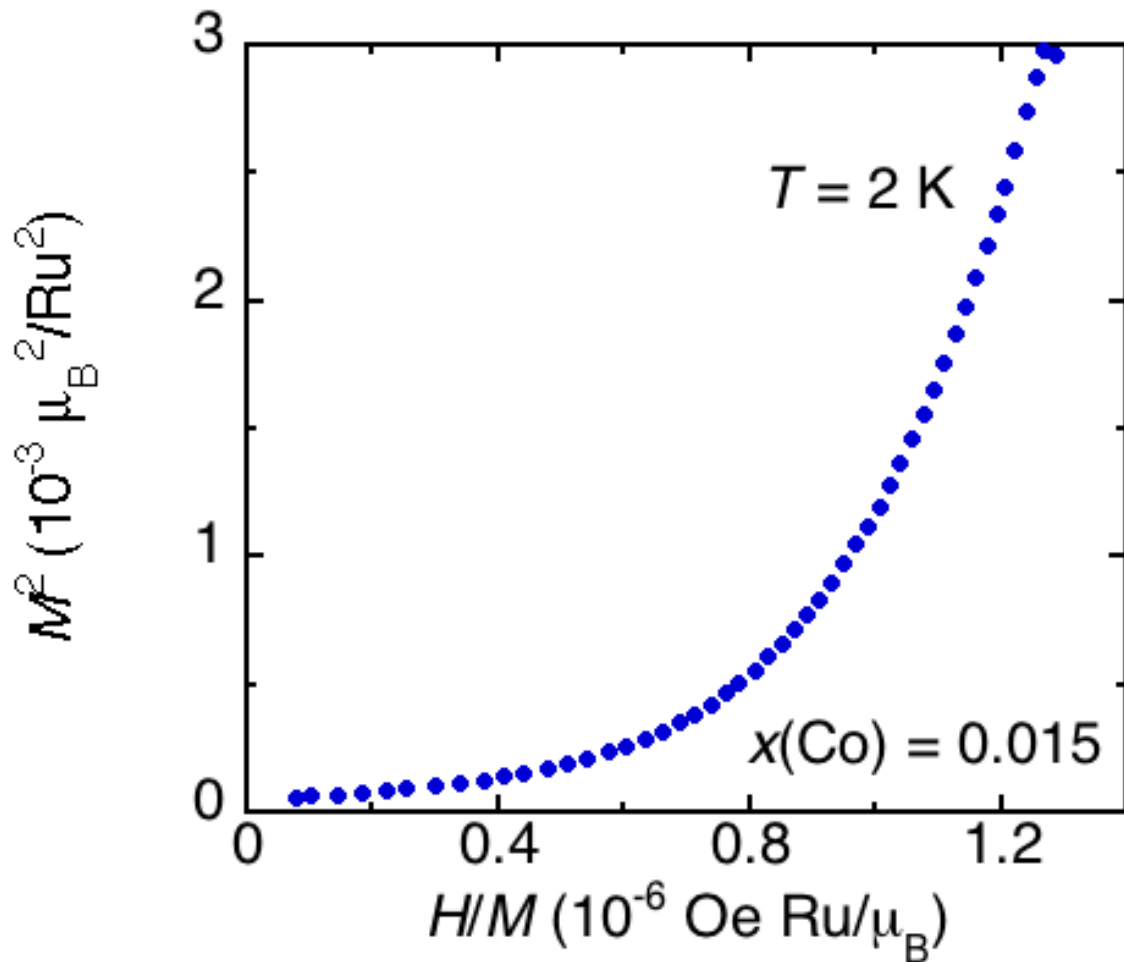

**SI-Fig. S1: Arrott plot of 1.5% Co-doped Sr<sub>2</sub>RuO<sub>4</sub> at  $T = 2 \text{ K}$ .** The curve does not intersect the vertical axis above the origin, implying that the sample does not form long-range FM order. This, combined with our other magnetization measurements, leads us to instead conclude that Co-doped Sr<sub>2</sub>RuO<sub>4</sub> forms short-range FM order.

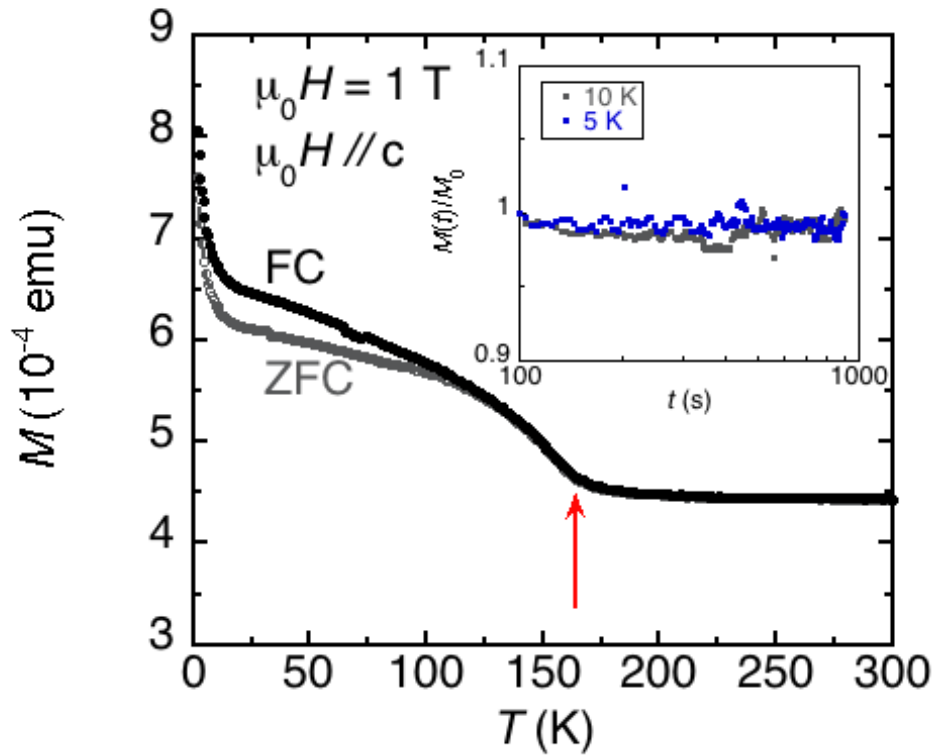

**SI-Fig. S2: Susceptibility data of undoped  $\text{Sr}_2\text{RuO}_4$  sample with substantial  $\text{SrRuO}_3$  intergrowth.** The arrow indicates the sharp upturn in susceptibility associated with  $\text{SrRuO}_3$  intergrowth. This feature is absent in our samples mentioned in the manuscript, indicating that these samples contain negligible  $\text{SrRuO}_3$  intergrowth. The inset shows the absence of relaxation in the sample with intergrowth.

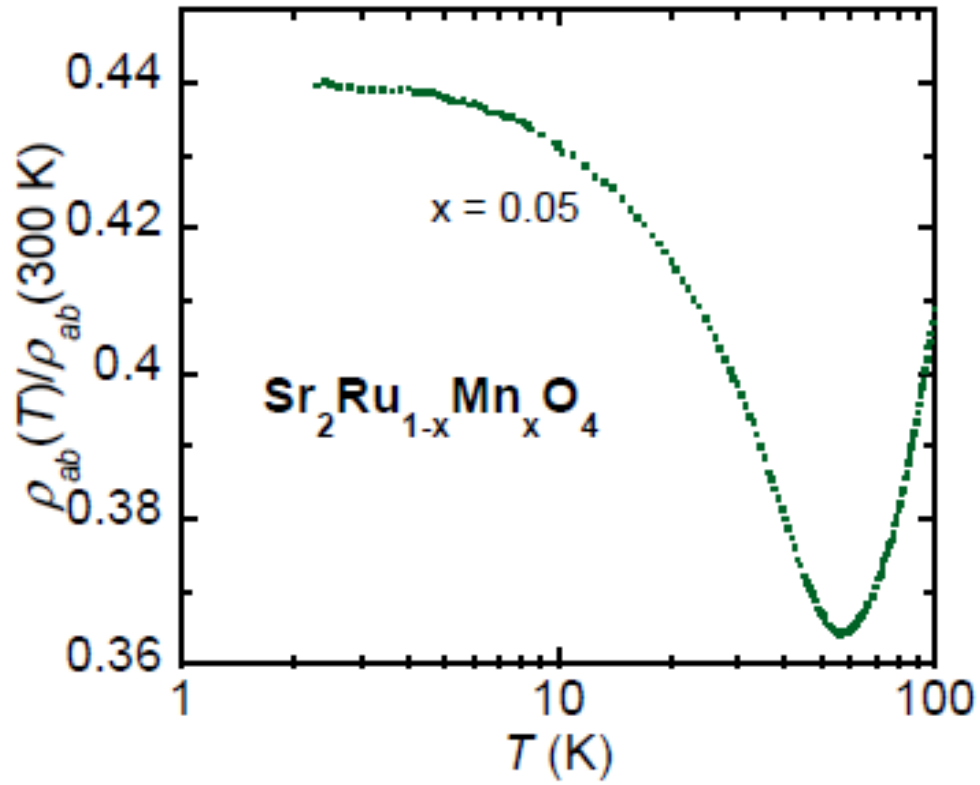

**SI-Fig. S3: Low-temperature upturn of 5% Mn-doped  $\text{Sr}_2\text{RuO}_4$  plotted on  $\log(T)$  scale.** We do not observe the expected  $\log(T)$  temperature dependence, which excludes the possibility that Mn-doping results in a Kondo effect.
